# Supplementary figures and images for: Loss of photoreceptorness and gain of genomic alterations in retinoblastoma reveal tumor progression
Source: PubMed Central journal article supplement — eBioMedicine. 2015 Jul 8;2(7):660–70. doi: 10.1016/j.ebiom.2015.06.022 (PMC4534696; doi:10.1016/j.ebiom.2015.06.022), 2015-07-08

Ward's retinoblastoma cluster

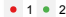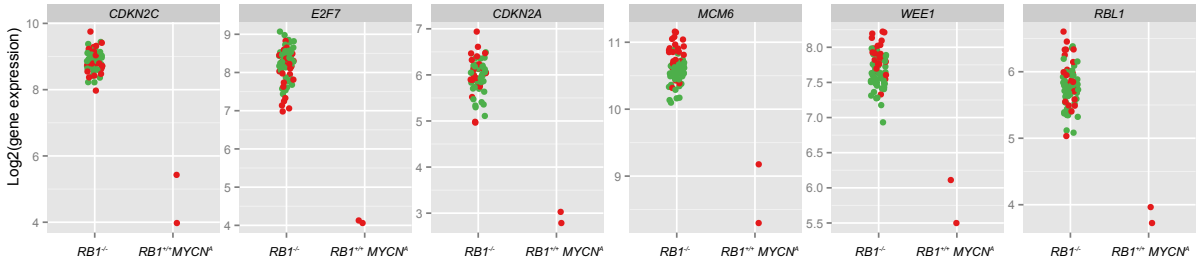

Supplement: mmc3.pdf [file mmc3.pdf]

Ward's retinoblastoma cluster    ● 1    ● 2

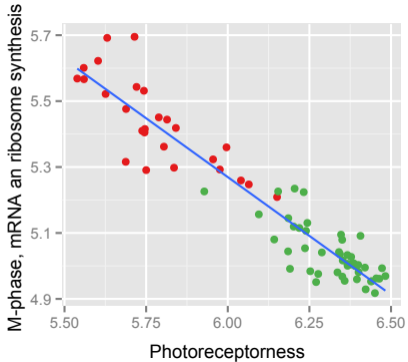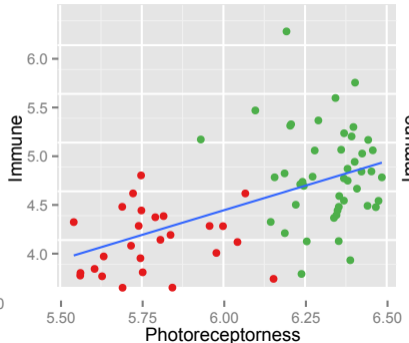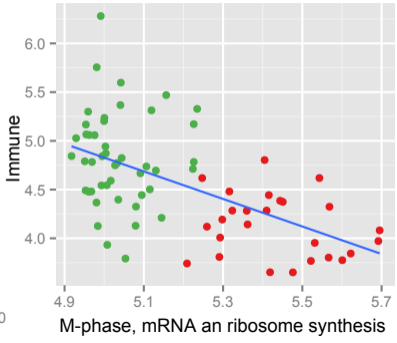

Supplement: mmc4.pdf [file mmc4.pdf]

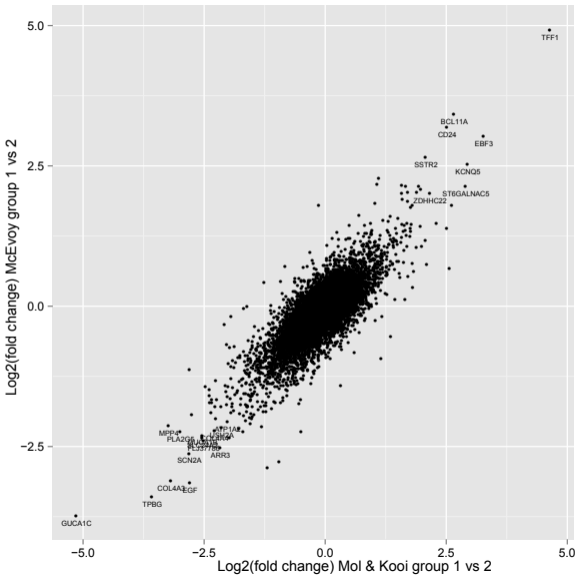

Supplement: mmc7.pdf [file mmc7.pdf]
